# Supplementary material for: Barriers to access to visceral leishmaniasis diagnosis and care among seasonal mobile workers in Western Tigray, Northern Ethiopia: A qualitative study
Source: PubMed Central journal article supplement (PMC6224040; doi:10.1371/journal.pntd.0006778), 2018-11-08
Supplement: pntd.0006778.s001.pdf [file pntd.0006778.s001.pdf]

**S1 Table. Characteristics of study population participating in interviews**

| Participant category    | Participant occupation/subcategory           | Date of session | Duration of session | Place of interview (District-Ward, location) | Participant address (District-Ward) |
|-------------------------|----------------------------------------------|-----------------|---------------------|----------------------------------------------|-------------------------------------|
| Mobile worker           | Hired farmer                                 | 01/31/17        | 00:32               | Kafta Humera-Maykadra                        | Kafta Humera-Adebay                 |
| Mobile worker           | Hired farmer                                 | 01/31/17        | 00:40               | Kafta Humera-Maykadra                        | Kafta Humera-Humera county          |
| Mobile worker           | Hired farmer                                 | 01/31/17        | 00:44               | Kafta Humera-Maykadra                        | Kafta Humera-Maykadra               |
| Mobile worker           | Hired farmer                                 | 01/31/17        | 00:40               | Kafta Humera-Maykadra                        | Kafta Humera-Maykadra               |
| Mobile worker           | Hired farmer                                 | 02/22/17        | 00:45               | Kafta Humera-Adebay                          | Kafta Humera-Adebay                 |
| Mobile worker           | Hired farmer                                 | 02/22/17        | 00:42               | Kafta Humera-Humera, town                    | Hawzen-Mydalu                       |
| Caretaker of VL patient | Caretaker of mobile resident                 | 02/17/17        | 00:53               | Kafta Humera-Rawiyan                         | Kafta Humera-Rawiyan                |
| Caretaker of VL patient | Caretaker of mobile resident                 | 02/17/17        | 00:39               | Kafta Humera-Baeker                          | Kafta Humera-Baeker                 |
| Caretaker of VL patient | Caretaker of mobile resident                 | 02/04/17        | 00:46               | Kafta Humera-Humera, hospital                | Kafta Humera-Adebay                 |
| Caretaker of VL patient | Caretaker of resident                        | 01/31/17        | 00:52               | Kafta Humera-Adebay                          | Kafta Humera-Adebay                 |
| Caretaker of VL patient | Caretaker of resident                        | 02/04/17        | 00:48               | Kafta Humera-Humera, hospital                | Kafta Humera-Maykadra               |
| Caretaker of VL patient | Caretaker of resident                        | 02/07/17        | 00:40               | Kafta Humera-Adebay                          | Kafta Humera-Adebay                 |
| Caretaker of VL patient | Caretaker of resident                        | 02/17/17        | 00:47               | Kafta Humera-Baeker                          | Kafta Humera-Baeker                 |
| Caretaker of VL patient | Caretaker of resident                        | 02/17/17        | 00:45               | Kafta Humera-Baeker                          | Kafta Humera-Baeker                 |
| Caretaker of VL patient | Caretaker of resident                        | 02/17/17        | 00:32               | Kafta Humera-Baeker                          | Kafta Humera-Baeker                 |
| VL patient              | Mobile resident: Hired farmer                | 02/20/17        | 00:51               | Kafta Humera-Bereket                         | Kafta Humera-Bereket                |
| VL patient              | Mobile worker: Tractor driver                | 01/28/17        | 00:52               | Kafta Humera-Humera, hospital                | Sheraro-Ziban Gedena                |
| VL patient              | Mobile worker: Hired farmer, gold miner      | 01/28/17        | 00:44               | Kafta Humera-Humera, hospital                | Wolkayt-Welel                       |
| VL patient              | Mobile worker: Hired farmer, herder          | 02/07/17        | 00:45               | Kafta Humera-Adebay                          | Kafta Humera-Adebay                 |
| VL patient              | Mobile worker: Hired farmer                  | 02/20/17        | 00:46               | Kafta Humera-Bereket                         | Kafta Humera-Bereket                |
| VL patient              | Mobile worker: Hired farmer                  | 02/22/17        | 00:43               | Kafta Humera-Adebay                          | Kafta Humera-Adebay                 |
| VL patient              | Mobile worker: Herder                        | 02/22/17        | 00:38               | Kafta Humera-Humera, hospital                | Gohola-04                           |
| VL patient              | Resident: Student                            | 01/28/17        | 00:42               | Kafta Humera-Humera, hospital                | Awira-Wolkayt                       |
| VL patient              | Resident: Susistence-level farmer            | 02/18/17        | 00:45               | Kafta Humera-Rawiyan                         | Kafta Humera-Rawiyan                |
| VL patient              | Resident: Subsistence-level farmer           | 02/22/17        | 00:42               | Kafta Humera-Humera, hospital                | Kafta Humera-Adebay                 |
| Community leader        | Nun                                          | 01/31/17        | 00:33               | Kafta Humera-Adebay                          | Kafta Humera-Adebay                 |
| Community leader        | Priest                                       | 01/31/17        | 00:41               | Kafta Humera-Adebay                          | Kafta Humera-Adebay                 |
| Community leader        | Imam                                         | 02/04/17        | 00:43               | Kafta Humera-Maykadra                        | Kafta Humera-Maykadra               |
| Community leader        | Political authority                          | 02/07/17        | 01:55               | Kafta Humera-Adebay, administration          | Kafta Humera-Adebay                 |
| Community leader        | Farm owner                                   | 02/07/17        | 00:42               | Kafta Humera-Adebay                          | Kafta Humera-Adebay                 |
| Community leader        | Farm/Camp manager                            | 02/07/17        | 00:35               | Kafta Humera, Goblel farm                    | Kafta Humera-Adebay                 |
| Community leader        | Priest                                       | 02/11/17        | 00:44               | Kafta Humera-Maykadra                        | Kafta Humera-Maykadra               |
| Community leader        | Political authority                          | 02/11/17        | 00:54               | Kafta Humera-Maykadra                        | Kafta Humera-Maykadra               |
| Community leader        | Farm owner, member women's organization      | 02/14/17        | 00:45               | Kafta Humera-Adebay                          | Kafta Humera-Adebay                 |
| Community leader        | Farm owner, member women's organization      | 02/14/17        | 00:45               | Kafta Humera-Adebay                          | Kafta Humera-Adebay                 |
| Community leader        | Civic authority                              | 02/17/17        | 00:59               | Kafta Humera-Humera, administration          | Kafta Humera-Humera town            |
| Healthcare worker       | Nurse                                        | 01/28/17        | 00:58               | Kafta Humera-Humera, hospital                | Kafta Humera-Humera town            |
| Healthcare worker       | Pharmacist                                   | 01/28/17        | 00:28               | Kafta Humera-Humera, hospital                | Kafta Humera-Humera town            |
| Healthcare worker       | Nurse                                        | 01/28/17        | 01:00               | Kafta Humera-Humera, hospital                | Kafta Humera-Humera town            |
| Healthcare worker       | General practitioner                         | 01/28/17        | 01:06               | Kafta Humera-Humera, hospital                | Kafta Humera-Humera town            |
| Healthcare worker       | Hospital authority                           | 01/28/17        | 00:45               | Kafta Humera-Humera, hospital                | Kafta Humera-Humera town            |
| Healthcare worker       | Private practitioner                         | 01/31/17        | 00:34               | Kafta Humera-Adebay                          | Kafta Humera-Adebay                 |
| Healthcare worker       | District health authority                    | 02/04/17        | 01:00               | Kafta Humera, District health office         | Kafta Humera-Humera town            |
| Healthcare worker       | Health centre authority                      | 02/07/17        | 00:42               | Kafta Humera-Bereket                         | Kafta Humera-Bereket                |
| Healthcare worker       | Pharmacist (Private drug shop owner)         | 02/11/17        | 00:40               | Kafta Humera-Maykadra                        | Kafta Humera-Maykadra               |
| Healthcare worker       | Private practitioner                         | 02/10/17        | 00:42               | Kafta Humera-Maykadra                        | Kafta Humera-Maykadra               |
| Healthcare worker       | Traditional healer, subsistence-level farmer | 02/17/17        | 00:40               | Kafta Humera-Humera, town                    | Kafta Humera-Humera town            |
| Healthcare worker       | Nurse                                        | 02/22/17        | 00:51               | Kafta Humera-Humera, hospital                | Kafta Humera-Humera town            |
| Healthcare worker       | Doctor                                       | 02/23/17        | 00:32               | Kafta Humera-Humera, hospital                | Kafta Humera-Humera town            |
| Healthcare worker       | Traditional healer, subsistence-level farmer | 02/22/17        | 00:50               | Kafta Humera-Maykadra                        | Kafta Humera-Maykadra               |
