# Supplementary material for: Barriers to access to visceral leishmaniasis diagnosis and care among seasonal mobile workers in Western Tigray, Northern Ethiopia: A qualitative study
Source: PubMed Central journal article supplement (PMC6224040; doi:10.1371/journal.pntd.0006778), 2018-11-08
Supplement: pntd.0006778.s002.pdf [file pntd.0006778.s002.pdf]

**S2 Table. Characteristics of study population participating in focus-group discussions**

| <b>Participant category</b> | <b>Participant occupation/subcategory</b>                                          | <b>Date of session</b> | <b>Duration of session</b> | <b>Place of interview (District-Ward, location)</b> | <b>N</b> |
|-----------------------------|------------------------------------------------------------------------------------|------------------------|----------------------------|-----------------------------------------------------|----------|
| Mobile workers              | Hired farmers                                                                      | 02/05/17               | 01:20                      | Kafta Humera-Maykadra                               | 10       |
| Mobile workers              | Hired farmers                                                                      | 02/14/17               | 01:47                      | Kafta Humera-Humera, town                           | 9        |
| Mobile residents            | Wives of hired farmers                                                             | 02/05/17               | 01:10                      | Kafta Humera-Maykadra                               | 10       |
| Caretakers of VL patients   | Caretakers of residents                                                            | 02/14/17               | 01:54                      | Kafta Humera-Adebay                                 | 7        |
| Caretakers of VL patients   | Caretakers of residents                                                            | 02/20/17               | 01:07                      | Kafta Humera-Rawiyen                                | 6        |
| VL patients                 | Mobile residents: Hired farmers                                                    | 02/14/17               | 01:45                      | Kafta Humera-Baeker                                 | 7        |
| VL patients                 | Residents: 3 subsistence-level farmers, 2 students, 1 driver                       | 02/11/17               | 01:53                      | Kafta Humera-Maykadra                               | 6        |
| VL patients                 | Residents: 1 security guard, 3 herders, 1 gold miner, 1 unspecified                | 02/14/17               | 01:55                      | Kafta Humera-Adebay                                 | 6        |
| Healthcare workers          | 1 pharmacy technician, 5 nurses, 1 public health nurse, 2 health extension workers | 02/07/17               | 01:39                      | Kafta Humera-Bereket                                | 9        |
| Healthcare workers          | Heads of health centers                                                            | 02/21/17               | 01:32                      | Kafta Humera-Humera, town                           | 8        |
| Healthcare workers          | Health extension workers                                                           | 02/20/17               | 01:13                      | Kafta Humera-Humera, hospital                       | 9        |
